# Supplementary material for: Transcriptomic Analysis of the Effect of Torin-2 on the Central Nervous System of Drosophila melanogaster
Source: MDPI journal article supplement (doi:10.3390/ijms24109095), 2023-05-22
Supplement: s1 [file s1]

**Supplementary Figure S1.** qPCR evaluation of gene expression changes under the chronic administration of Torin-2. *eIF4A* is taken as the reference gene

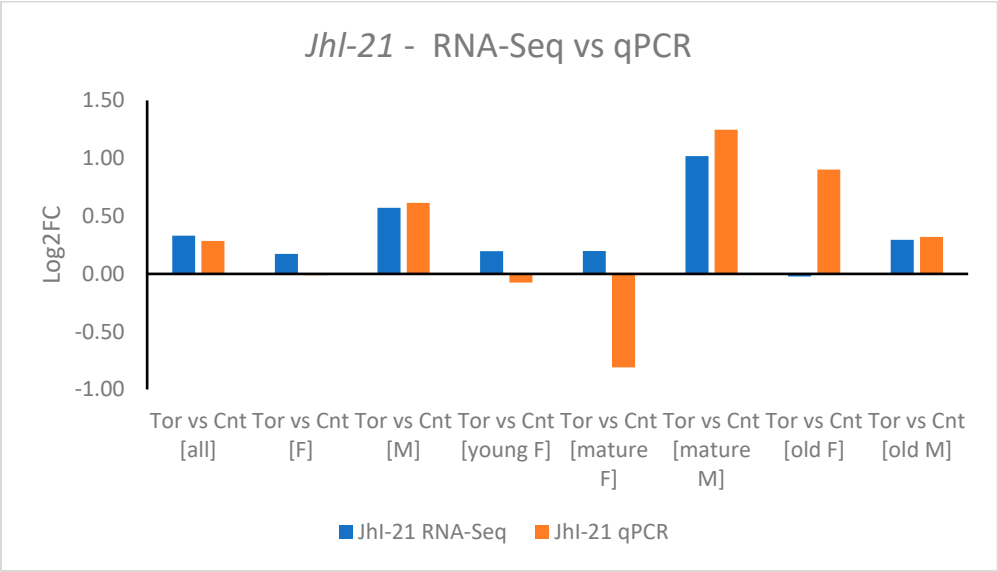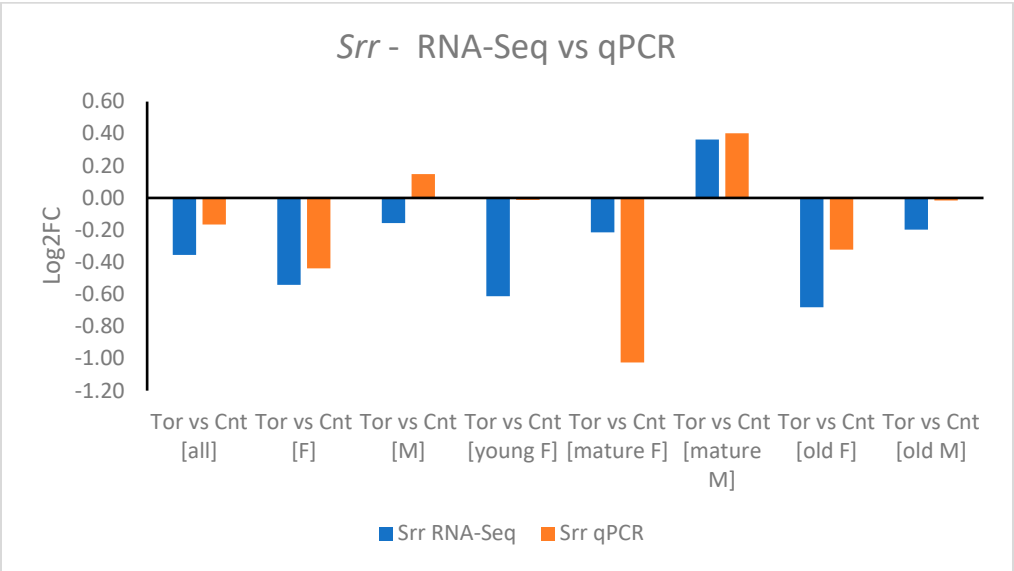

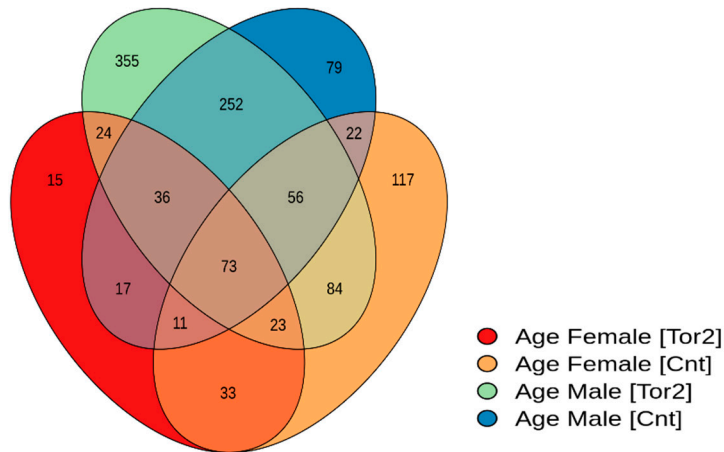

**Supplementary Figure S2.** Venn diagram, which shows an overlap of the lists of genes whose expression changes significantly with age ( $p < 0.05$ ) in control and Torin-fed flies of different genders.

**Supplementary Table S1.** Lifespan effects of Torin-2 treatment taken with various concentrations

|         | Media<br>n<br>(days) | delta-Medi<br>an<br>(%) | Fisher’s exact<br>test |              | 90 <sup>th</sup><br>percen<br>tile<br>(days) | delta<br>90 <sup>th</sup><br>percen<br>tile<br>(%) | Fisher’s exact<br>test |        | Wang-Allison test |        | N,<br>flies |
|---------|----------------------|-------------------------|------------------------|--------------|----------------------------------------------|----------------------------------------------------|------------------------|--------|-------------------|--------|-------------|
|         |                      |                         | p                      | FDR          |                                              |                                                    | p                      | FDR    | p                 | FDR    |             |
| Males   |                      |                         |                        |              |                                              |                                                    |                        |        |                   |        |             |
| Control | 46                   |                         | n/a                    | n/a          | 55                                           |                                                    | n/a                    | n/a    | n/a               | n/a    | 442         |
| 0.5 μM  | 48                   | 4                       | p<0.00<br>01           | p<0.00<br>01 | 57                                           | 3.6                                                | p>0.05                 | p>0.05 | p>0.05            | p>0.05 | 490         |
| 1 μM    | 48                   | 4                       | p<0.00<br>01           | p<0.00<br>01 | 57                                           | 3.6                                                | p<0.05                 | p>0.05 | p>0.05            | p>0.05 | 484         |
| 5 μM    | 46                   | 0                       | p>0.05                 | p>0.05       | 55                                           | 0                                                  | p>0.05                 | p>0.05 | p>0.05            | p>0.05 | 460         |
| 10 μM   | 46                   | 0                       | p>0.05                 | p>0.05       | 56                                           | 1.8                                                | p>0.05                 | p>0.05 | p>0.05            | p>0.05 | 507         |
| Females |                      |                         |                        |              |                                              |                                                    |                        |        |                   |        |             |
| Control | 55                   | n/a                     | n/a                    | n/a          | 63                                           | n/a                                                | n/a                    | n/a    | n/a               | n/a    | 470         |
| 0.5 μM  | 55                   | 0                       | p>0.05                 | p>0.05       | 64                                           | 1.6                                                | p>0.05                 | p>0.05 | p<0.05            | p>0.05 | 495         |
| 1 μM    | 55                   | 0                       | p>0.05                 | p>0.05       | 63                                           | 0                                                  | p>0.05                 | p>0.05 | p>0.05            | p>0.05 | 480         |
| 5 μM    | 54                   | -2                      | p>0.05                 | p>0.05       | 61                                           | -3                                                 | p<0.05                 | p<0.05 | p>0.05            | p>0.05 | 494         |
| 10 μM   | 54                   | -2                      | p>0.05                 | p>0.05       | 63                                           | 0                                                  | p>0.05                 | p>0.05 | p>0.05            | p>0.05 | 474         |

**Supplementary Table S2.** Differential gene expression data on pooled comparison of Torin-2-treated versus Control groups. p-values were not FDR-adjusted. LogFC is taken as “minimal” across 3 methods of 3'-bias adjustment, p-value is taken as “maximal”.

| Symbol           | Log <sub>2</sub> FC | p (QLF test) | Symbol           | Log <sub>2</sub> FC | p (QLF test) |
|------------------|---------------------|--------------|------------------|---------------------|--------------|
| <i>cort</i>      | 2,03                | 0,0007       | <i>Rassf</i>     | 0,2                 | 0,02         |
| <i>Or42b</i>     | 1,07                | 0,04         | <i>Sirt2</i>     | -0,16               | 0,05         |
| <i>Or1a</i>      | 0,9                 | 0,04         | <i>Mondo</i>     | -0,16               | 0,03         |
| <i>CG11529</i>   | 0,67                | 0,007        | <i>CG8858</i>    | -0,17               | 0,03         |
| <i>E23</i>       | 0,54                | 0,003        | <i>CG8405</i>    | -0,17               | 0,04         |
| <i>bip1</i>      | 0,53                | 0,01         | <i>hook</i>      | -0,17               | 0,02         |
| <i>Prat</i>      | 0,52                | 0,03         | <i>CG11873</i>   | -0,19               | 0,03         |
| <i>CG5290</i>    | 0,5                 | 0,01         | <i>mRpS29</i>    | -0,21               | 0,05         |
| <i>CG10466</i>   | 0,44                | 0,01         | <i>CG12531</i>   | -0,22               | 0,03         |
| <i>Stip1</i>     | 0,43                | 0,004        | <i>Atx2</i>      | -0,24               | 0,02         |
| <i>CG17816</i>   | 0,4                 | 0,01         | <i>dbr</i>       | -0,25               | 0,02         |
| <i>CG5380</i>    | 0,38                | 0,02         | <i>CG7997</i>    | -0,26               | 0,04         |
| <i>Bdp1</i>      | 0,38                | 0,006        | <i>CG34354</i>   | -0,26               | 0,04         |
| <i>RfC4</i>      | 0,38                | 0,02         | <i>Golgin104</i> | -0,28               | 0,03         |
| <i>SmD3</i>      | 0,37                | 0,03         | <i>CG10731</i>   | -0,28               | 0,04         |
| <i>CG15270</i>   | 0,37                | 0,04         | <i>tn</i>        | -0,29               | 0,02         |
| <i>BCL7-like</i> | 0,35                | 0,03         | <i>CG7470</i>    | -0,32               | 0,008        |
| <i>arx</i>       | 0,33                | 0,04         | <i>HERC2</i>     | -0,35               | 0,006        |
| <i>GstE1</i>     | 0,33                | 0,02         | <i>Srr</i>       | -0,35               | 0,01         |
| <i>CG16908</i>   | 0,32                | 0,03         | <i>eya</i>       | -0,36               | 0,02         |
| <i>CG17378</i>   | 0,32                | 0,02         | <i>AMPKalpha</i> | -0,36               | 0,01         |
| <i>Sema2a</i>    | 0,31                | 0,01         | <i>CG32085</i>   | -0,38               | 0,008        |
| <i>CG9667</i>    | 0,29                | 0,04         | <i>Ugt36E1</i>   | -0,41               | 0,02         |
| <i>mbfl</i>      | 0,25                | 0,02         | <i>CG13896</i>   | -0,45               | 0,05         |
| <i>Lsm10</i>     | -0,5                | 0,02         |                  |                     |              |

**Supplementary Table S3.** Differential gene expression data summary on various comparisons, only MAPK pathway (GO:0000165). m1, m2, m3 – various methods of 3’-bias adjustment, m4 – not adjusted.

| Gene ID     | Symbol | Name                                      | LogFC:                       |       |      |       | LogFC:                       |       |      |       | LogFC:                     |       |      |       | LogFC:                     |       |      |       | LogFC:                     |       |      |       | LogFC:                   |       |      |       |
|-------------|--------|-------------------------------------------|------------------------------|-------|------|-------|------------------------------|-------|------|-------|----------------------------|-------|------|-------|----------------------------|-------|------|-------|----------------------------|-------|------|-------|--------------------------|-------|------|-------|
|             |        |                                           | Tor2 vs Cnt [Young, females] |       |      |       | Tor2 vs Cnt [Adult, females] |       |      |       | Tor2 vs Cnt [Old, females] |       |      |       | Tor2 vs Cnt [Young, males] |       |      |       | Tor2 vs Cnt [Adult, males] |       |      |       | Tor2 vs Cnt [Old, males] |       |      |       |
|             |        |                                           | m1:3                         | m2:bi | m3   | m4:n  | m1:3                         | m2:bi | m3   | m4:n  | m1:3                       | m2:bi | m3   | m4:n  | m1:3                       | m2:bi | m3   | m4:n  | m1:3                       | m2:bi | m3   | m4:n  | m1:3                     | m2:bi | m3   | m4:n  |
|             |        |                                           | t-sl                         | ns-sl | :sl  | one   | t-sl                         | ns-sl | :sl  | one   | t-sl                       | ns-sl | :sl  | one   | t-sl                       | ns-sl | :sl  | one   | t-sl                       | ns-sl | :sl  | one   | t-sl                     | ns-sl | :sl  | one   |
| FBgn0016756 | Usp47  | Ubiquitin specific protease 47            | -0.50                        | -0.30 | 0.26 | -0.16 | -0.36                        | -0.49 | 0.53 | -0.60 | -0.44                      | -0.35 | 0.30 | -0.20 | 0.48                       | 0.34  | 0.35 | 0.40  | -0.17                      | 0.17  | 0.40 | 0.14  | 0.13                     | 0.27  | 0.30 | 0.38  |
| FBgn0011291 | Jra    | Jun-related antigen                       | -0.37                        | -0.10 | 0.14 | -0.18 | 0.62                         | 0.56  | 0.57 | 0.57  | -0.51                      | -0.32 | 0.37 | -0.39 | 0.30                       | 0.38  | 0.36 | 0.36  | 0.65                       | 0.54  | 0.70 | 0.68  | 0.18                     | 0.09  | 0.80 | 0.05  |
| FBgn0000711 | flw    | flapwing                                  | 0.94                         | 0.34  | 0.32 | 0.34  | -1.58                        | -0.28 | 0.25 | -0.28 | 1.19                       | 0.25  | 0.21 | 0.25  | -0.42                      | -0.17 | 0.16 | -0.14 | -0.19                      | -0.51 | 0.40 | -0.37 | 0.27                     | 0.01  | 0.80 | 0.13  |
| FBgn0264493 | rdx    | roadkill                                  | 0.20                         | 0.43  | 0.44 | 0.49  | 0.80                         | 0.57  | 0.54 | 0.50  | 0.63                       | 0.47  | 0.51 | 0.56  | 0.23                       | 0.02  | 0.40 | 0.06  | -0.52                      | -0.65 | 0.60 | -0.57 | -0.02                    | -0.02 | 0.60 | 0.14  |
| FBgn0014388 | sty    | sprouty                                   | 1.43                         | 0.42  | 0.57 | 0.63  | 0.73                         | -0.27 | 0.32 | -0.37 | 0.28                       | 0.14  | 0.50 | 0.31  | 0.46                       | 0.32  | 0.38 | 0.38  | -0.58                      | -0.46 | 0.50 | -0.49 | 0.94                     | 0.23  | 0.20 | 0.35  |
| FBgn0020767 | Spred  | Sprouty-related protein with EVH-1 domain | 0.95                         | 0.58  | 0.59 | 0.63  | -0.57                        | -0.32 | 0.34 | -0.38 | 0.53                       | 0.16  | 0.80 | 0.23  | -0.07                      | -0.02 | 0.10 | 0.03  | -0.31                      | -0.50 | 0.40 | -0.41 | 0.22                     | 0.29  | 0.30 | 0.46  |
| FBgn0024811 | Crk    | Crk oncogene                              | 0.47                         | 0.50  | 0.46 | 0.39  | 0.02                         | -0.33 | 0.23 | -0.21 | 0.25                       | 0.41  | 0.39 | 0.34  | -0.20                      | -0.04 | 0.07 | -0.09 | -0.30                      | -0.39 | 0.30 | -0.44 | 0.21                     | 0.25  | 0.10 | 0.11  |
| FBgn0003371 | sgg    | shaggy                                    | 0.54                         | 0.53  | 0.56 | 0.61  | -0.45                        | -0.29 | 0.30 | -0.35 | 0.16                       | 0.27  | 0.29 | 0.35  | 0.01                       | 0.00  | 0.20 | 0.05  | -0.47                      | -0.47 | 0.40 | -0.38 | -0.07                    | 0.13  | 0.20 | 0.29  |
| FBgn0015286 | Rala   | Ras-like protein A                        | 0.04                         | 0.37  | 0.37 | 0.38  | 0.41                         | 0.34  | 0.37 | 0.34  | 0.08                       | 0.08  | 0.07 | 0.09  | -0.64                      | -0.30 | 0.29 | -0.27 | -0.56                      | -0.70 | 0.50 | -0.55 | -0.07                    | -0.19 | 0.00 | -0.06 |
| FBgn0003209 | raw    | raw                                       | 0.61                         | 0.41  | 0.49 | 0.55  | -0.23                        | -0.43 | 0.47 | -0.52 | 0.07                       | -0.06 | 0.40 | 0.11  | 0.28                       | 0.13  | 0.20 | 0.20  | 0.36                       | 0.84  | 0.70 | 0.81  | 0.55                     | 0.35  | 0.30 | 0.46  |
| FBgn0032682 | grnd   | grindelwald                               | 0.27                         | 0.73  | 0.72 | 0.70  | -0.22                        | -0.39 | 0.26 | -0.27 | 0.26                       | 0.45  | 0.36 | 0.36  | 0.33                       | 0.19  | 0.19 | 0.19  | -0.40                      | -0.51 | 0.30 | -0.31 | -0.03                    | -0.03 | 0.00 | 0.01  |
| FBgn0003256 | rl     | rolled                                    | 1.61                         | 0.89  | 0.88 | 0.90  | 0.13                         | -0.22 | 0.18 | -0.21 | 0.53                       | 0.36  | 0.32 | 0.35  | -0.31                      | -0.48 | 0.40 | -0.45 | 0.13                       | -0.30 | 0.10 | -0.15 | 0.32                     | 0.04  | 0.20 | 0.16  |
| FBgn0086779 | step   | steppke                                   | 1.05                         | 0.22  | 0.28 | 0.32  | -1.28                        | -0.02 | 0.06 | -0.10 | 0.81                       | 0.31  | 0.40 | 0.39  | -0.59                      | -0.20 | 0.10 | -0.16 | -0.24                      | -0.38 | 0.30 | -0.30 | 0.40                     | -0.03 | 0.00 | 0.14  |
| FBgn0036934 | sNPF-R | short neuropeptide F receptor             | 0.44                         | 0.54  | 0.69 | 0.76  | 1.44                         | 0.34  | 0.25 | 0.20  | 1.88                       | 1.11  | 1.20 | 1.29  |                            | 0.27  | 0.30 | 0.34  |                            | -0.50 | 0.50 | -0.52 |                          | 0.47  | 0.40 | 0.59  |
| FBgn0014006 | Ask1   | Apoptotic signal-regulating kinase 1      | -0.29                        | -0.24 | 0.20 | -0.11 | 0.65                         | 0.40  | 0.50 | 0.28  | -0.45                      | -0.41 | 0.30 | -0.26 | -0.18                      | -0.13 | 0.20 | -0.08 | -0.05                      | 0.11  | 0.10 | 0.08  | -0.17                    | -0.26 | 0.20 | -0.14 |
| FBgn0038331 | Ccm3   | Cerebral cavernous malformation 3         | 0.88                         | 0.35  | 0.31 | 0.27  | -0.42                        | -0.08 | 0.02 | -0.02 | 0.44                       | 0.26  | 0.20 | 0.19  | -0.16                      | -0.24 | 0.20 | -0.27 | -0.31                      | -0.53 | 0.30 | -0.36 | 0.29                     | 0.11  | 0.10 | 0.08  |
| FBgn0000173 | ben    | bendless                                  | 0.13                         | 0.26  | 0.25 | 0.22  | -0.07                        | -0.33 | 0.10 | -0.19 | -0.10                      | 0.12  | 0.06 | 0.05  | -0.25                      | -0.15 | 0.10 | -0.15 | -0.47                      | -0.79 | 0.50 | -0.61 | -0.11                    | -0.16 | 0.10 | -0.12 |
| FBgn0020224 | Cbl    | Cbl proto-oncogene                        | 0.54                         | -0.10 | 0.01 | 0.06  | -0.88                        | -0.28 | 0.34 | -0.40 | 0.72                       | 0.02  | 0.10 | 0.18  | 0.01                       | 0.23  | 0.20 | 0.29  | -0.20                      | -0.32 | 0.40 | -0.34 | 0.38                     | 0.15  | 0.10 | 0.27  |
| FBgn0033153 | Gadd45 | Growth arrest and DNA damage-inducible 45 | 0.03                         | 0.61  | 0.54 | 0.51  |                              | 1.60  | 1.60 | -1.61 | -0.27                      | -0.18 | 0.20 | -0.24 | 0.62                       | 0.51  | 0.40 | 0.46  | 0.64                       | 0.52  | 0.60 | 0.66  | 0.27                     | 0.28  | 0.20 | 0.25  |
| FBgn0005672 | spi    | spitz                                     | 0.49                         | 0.30  | 0.25 | 0.22  |                              | 0.40  | 0.50 | 0.44  | 0.06                       | 0.11  | 0.10 | 0.04  | 0.25                       | 0.20  | 0.10 | 0.17  | 0.51                       | 0.27  | 0.40 | 0.42  | -0.01                    | 0.01  | 0.00 | -0.02 |

|             |                  |                                                |       |       |      |       |       |       |      |       |       |       |      |       |       |       |      |       |       |       |      |       |       |       |      |       |
|-------------|------------------|------------------------------------------------|-------|-------|------|-------|-------|-------|------|-------|-------|-------|------|-------|-------|-------|------|-------|-------|-------|------|-------|-------|-------|------|-------|
| FBgn0267698 | Pak              | p21-activated kinase                           | 0.80  | 0.37  | 0.47 | 0.54  | -0.48 | -0.13 | 0.18 | -0.23 | 0.79  | 0.17  | 0.26 | 0.34  | 0.25  | -0.13 | 0.09 | -0.06 | 0.21  | -0.09 | 0.18 | -0.11 | -0.30 | 0.17  | 0.08 | 0.29  |
| FBgn0003079 | Raf              | Raf oncogene                                   | 0.07  | -0.16 | 0.08 | -0.01 | -0.21 | 0.21  | 0.14 | 0.09  | 0.03  | -0.29 | 0.20 | -0.13 | -0.27 | -0.31 | 0.29 | -0.26 | 0.13  | 0.47  | 0.37 | 0.43  | -0.53 | -0.27 | 0.25 | -0.15 |
| FBgn0086346 | ALIX             | ALG-2 Interacting protein X                    | -0.12 | -0.16 | 0.15 | -0.11 | -0.28 | -0.42 | 0.48 | -0.52 | -0.69 | -0.59 | 0.55 | -0.51 | 0.09  | -0.02 | 0.00 | 0.02  | 0.45  | 0.47  | 0.53 | 0.57  | 0.22  | 0.32  | 0.40 | 0.47  |
| FBgn0011230 | poe              | purity of essence                              | -0.70 | -0.39 | 0.47 | -0.25 | 0.35  | 0.27  | 0.28 | 0.15  | -0.35 | -0.37 | 0.41 | -0.20 | -0.07 | -0.09 | 0.14 | -0.05 | 0.13  | 0.24  | 0.03 | 0.22  | -0.16 | -0.08 | 0.27 | 0.05  |
| FBgn0086378 | Alg-2            | Apoptosis-linked gene-2                        | 0.79  | 1.53  | 1.46 | 1.41  | -0.15 | -0.33 | 0.22 | -0.21 | 0.25  | 0.30  | 0.26 | 0.22  | 0.11  | -0.20 | 0.25 | -0.26 | -0.33 | -0.45 | 0.46 | -0.50 | 0.06  | 0.04  | 0.04 | -0.10 |
| FBgn0020249 | stck             | steamer duck                                   | -0.31 | -0.26 | 0.29 | -0.33 | 0.08  | 0.07  | 0.10 | 0.11  | 0.08  | 0.15  | 0.09 | 0.06  | -0.24 | -0.27 | 0.29 | -0.30 | 0.27  | 0.14  | 0.33 | 0.30  | 0.01  | -0.12 | 0.11 | -0.15 |
| FBgn0032210 | CYLD             | Cylindromatosis                                | 0.16  | 0.32  | 0.29 | 0.29  | 0.12  | -0.19 | 0.04 | -0.06 | 0.27  | 0.40  | 0.32 | 0.33  | -0.06 | -0.16 | 0.17 | -0.16 | -0.01 | -0.38 | 0.19 | -0.18 | -0.17 | -0.19 | 0.16 | -0.15 |
| FBgn0004638 | drk              | downstream of receptor kinase                  | 0.86  | 0.35  | 0.34 | 0.34  | -0.26 | -0.23 | 0.19 | -0.21 | 0.35  | 0.12  | 0.09 | 0.11  | -0.29 | -0.04 | 0.03 | -0.02 | -0.25 | -0.75 | 0.62 | -0.61 | 0.06  | -0.22 | 0.13 | -0.11 |
| FBgn0040281 | Aplip1           | APP-like protein interacting protein 1         | 0.60  | 0.30  | 0.24 | 0.25  | -0.35 | -0.50 | 0.51 | -0.54 | 0.34  | 0.42  | 0.37 | 0.39  | -0.09 | 0.15  | 0.17 | 0.18  | -0.11 | -0.21 | 0.08 | -0.06 | -0.07 | 0.07  | 0.15 | 0.19  |
| FBgn0040068 | Vav              | Vav guanine nucleotide exchange factor         | 0.86  | 0.23  | 0.30 | 0.37  | -0.81 | -0.04 | 0.08 | -0.14 | 0.66  | 0.22  | 0.30 | 0.37  | -0.15 | -0.11 | 0.08 | -0.05 | -0.21 | -0.14 | 0.24 | -0.17 | 0.04  | 0.13  | 0.14 | 0.25  |
| FBgn0024846 | p38b             | p38b MAP kinase                                | -0.14 | -0.06 | 0.09 | -0.10 | -1.54 | -0.94 | 0.96 | -0.97 | -0.44 | -0.57 | 0.63 | -0.63 | 0.10  | -0.10 | 0.10 | -0.10 | 1.40  | 0.68  | 0.83 | 0.82  | -0.13 | 0.21  | 0.26 | 0.25  |
| FBgn0010269 | Dsor1            | Downstream of raf1                             | -0.54 | -0.55 | 0.61 | -0.64 | -0.54 | -0.32 | 0.33 | -0.34 | -0.14 | 0.17  | 0.09 | 0.09  | 0.35  | 0.54  | 0.51 | 0.51  | 0.64  | 0.15  | 0.31 | 0.30  | 0.46  | 0.66  | 0.66 | 0.64  |
| FBgn0283500 | Sac1             | Sac1 phosphatase                               | -0.05 | -0.25 | 0.27 | -0.25 | -0.96 | -0.67 | 0.71 | -0.73 | 0.04  | -0.18 | 0.22 | -0.19 | 0.05  | 0.21  | 0.23 | 0.25  | -0.25 | -0.09 | 0.04 | 0.06  | 0.19  | 0.17  | 0.24 | 0.27  |
| FBgn0035601 | Uev1A            | Ubiquitin-conjugating enzyme variant 1A        | 0.20  | 0.24  | 0.22 | 0.17  | -0.17 | -0.14 | 0.07 | -0.06 | 0.16  | 0.09  | 0.03 | 0.00  | -0.05 | -0.10 | 0.11 | -0.12 | -0.43 | -0.73 | 0.52 | -0.56 | -0.09 | -0.21 | 0.20 | -0.25 |
| FBgn0035688 | fmt              | fiery mountain                                 | 0.08  | 0.13  | 0.18 | 0.28  | -0.26 | -0.09 | 0.14 | -0.21 | 0.45  | 0.14  | 0.20 | 0.30  | -0.20 | -0.11 | 0.10 | -0.06 | -0.19 | -0.24 | 0.36 | -0.26 | -0.22 | -0.08 | 0.11 | 0.04  |
| FBgn0086677 | jeb              | jelly belly                                    | 0.27  | -0.07 | 0.03 | 0.11  | -0.28 | -0.13 | 0.17 | -0.26 | -0.11 | -0.04 | 0.02 | 0.12  | -0.13 | -0.14 | 0.14 | -0.08 | -0.67 | -0.71 | 0.85 | -0.73 | -0.40 | -0.23 | 0.30 | -0.09 |
| FBgn0036844 | Mkp3             | Mitogen-activated protein kinase phosphatase 3 | 0.20  | 0.16  | 0.18 | 0.22  | -0.33 | -0.33 | 0.36 | -0.40 | -0.10 | -0.02 | 0.01 | 0.06  | -0.87 | -0.21 | 0.19 | -0.17 | -0.15 | -0.36 | 0.32 | -0.28 | -0.19 | 0.14  | 0.22 | 0.30  |
| FBgn0260635 | Diap1            | Death-associated inhibitor of apoptosis 1      | 0.10  | 0.13  | 0.09 | 0.09  | -0.26 | -0.51 | 0.50 | -0.52 | -0.04 | 0.06  | 0.02 | -0.01 | 0.26  | 0.34  | 0.34 | 0.34  | 0.28  | 0.07  | 0.25 | 0.25  | 0.79  | 0.73  | 0.55 | 0.76  |
| FBgn0036756 | Cln3             | Cln3                                           | 0.38  | 0.30  | 0.26 | 0.23  | 0.47  | 0.06  | 0.12 | 0.12  | -0.47 | -0.23 | 0.32 | -0.34 | -0.19 | -0.22 | 0.24 | -0.24 | 0.36  | -0.15 | 0.03 | 0.01  | -0.50 | -0.37 | 0.38 | -0.40 |
| FBgn0015513 | mbc              | myoblast city                                  | 1.57  | 0.02  | 0.04 | 0.17  | -1.38 | 0.26  | 0.22 | 0.13  | 0.92  | 0.07  | 0.01 | 0.24  | -0.54 | -0.26 | 0.28 | -0.22 | -0.18 | 0.08  | 0.07 | 0.05  | 0.32  | -0.12 | 0.20 | 0.01  |
| FBgn0036932 | CG14184          |                                                | -0.15 | -0.17 | 0.19 | -0.31 | 0.14  | 0.27  | 0.15 | 0.19  | 0.12  | 0.15  | 0.05 | 0.06  | 0.05  | -0.03 | 0.04 | -0.08 | -0.18 | 0.03  | 0.27 | -0.37 | -0.20 | -0.19 | 0.30 | -0.45 |
| FBgn0267487 | Ptp61F           | Protein tyrosine phosphatase 61F               | 0.73  | 0.45  | 0.49 | 0.52  | 0.30  | -0.06 | 0.09 | -0.12 | 0.16  | 0.19  | 0.23 | 0.27  | 0.14  | 0.12  | 0.14 | 0.16  | 0.03  | 0.06  | 0.12 | 0.15  | -0.16 | 0.01  | 0.12 | 0.18  |
| FBgn0263395 | hppy             | happyhour                                      | 1.64  | 0.36  | 0.42 | 0.50  | -0.68 | 0.07  | 0.03 | -0.03 | 0.48  | 0.13  | 0.21 | 0.30  | -0.43 | -0.17 | 0.16 | -0.12 | 0.50  | 0.27  | 0.16 | 0.24  | 0.01  | 0.05  | 0.04 | 0.17  |
| FBgn0001234 | lncRNA:Hsr omega | Heat shock RNA omega                           | -0.35 | -0.29 | 0.26 | -0.12 | 0.16  | -0.05 | 0.07 | -0.16 | 0.01  | 0.24  | 0.25 | 0.39  | 0.10  | 0.24  | 0.22 | 0.28  | -0.23 | -0.19 | 0.36 | -0.22 | 0.00  | -0.02 | 0.10 | 0.12  |
| FBgn0004436 | Ubc6             | Ubiquitin conjugating enzyme 6                 | 0.57  | 0.40  | 0.35 | 0.32  | -0.02 | -0.20 | 0.12 | -0.13 | 0.17  | 0.18  | 0.01 | 0.09  | -0.01 | 0.20  | 0.17 | 0.17  | -0.13 | -0.55 | 0.36 | -0.38 | -0.01 | 0.05  | 0.03 | 0.01  |

|             |        |                                     |       |       |      |       |       |       |      |       |       |       |      |       |       |       |      |       |       |       |      |       |       |       |      |       |
|-------------|--------|-------------------------------------|-------|-------|------|-------|-------|-------|------|-------|-------|-------|------|-------|-------|-------|------|-------|-------|-------|------|-------|-------|-------|------|-------|
| FBgn0015765 | p38a   | p38a MAP kinase                     | -0.01 | 0.21  | 0.15 | 0.12  | -0.36 | -0.38 | 0.30 | -0.30 | -0.29 | -0.07 | 0.13 | -0.15 | 0.08  | 0.05  | 0.04 | 0.03  | -0.53 | -0.67 | 0.48 | -0.51 | -0.20 | -0.15 | 0.16 | -0.19 |
| FBgn0044323 | Cka    | Connector of kinase to AP-1         | 0.52  | 0.11  | 0.22 | 0.28  | -0.70 | -0.10 | 0.15 | -0.20 | 0.44  | 0.11  | 0.20 | 0.26  | 0.01  | -0.09 | 0.07 | -0.04 | -0.31 | -0.37 | 0.45 | -0.39 | 0.11  | -0.04 | 0.01 | 0.09  |
| FBgn0003731 | Egfr   | Epidermal growth factor receptor    | 0.26  | -0.06 | 0.03 | 0.08  | -0.24 | -0.30 | 0.34 | -0.42 | -0.22 | -0.24 | 0.19 | -0.08 | -0.42 | -0.36 | 0.35 | -0.30 | -0.10 | 0.05  | 0.08 | 0.02  | -0.12 | 0.05  | 0.00 | 0.17  |
| FBgn0032816 | Nf-YB  | Nuclear factor Y-box B              | -0.31 | -0.20 | 0.25 | -0.35 | 0.02  | -0.20 | 0.19 | -0.16 | 0.32  | 0.28  | 0.33 | 0.25  | 0.17  | 0.08  | 0.08 | 0.05  | -0.52 | -0.40 | 0.56 | -0.64 | 0.05  | 0.01  | 0.05 | -0.17 |
| FBgn0283499 | InR    | Insulin-like receptor               | 0.99  | 0.40  | 0.44 | 0.61  | -0.02 | 0.18  | 0.14 | 0.03  | 0.16  | 0.38  | 0.39 | 0.55  | 0.03  | 0.02  | 0.00 | 0.08  | -0.66 | -0.62 | 0.77 | -0.62 | 0.19  | 0.07  | 0.00 | 0.21  |
| FBgn0003053 | peb    | pebbled                             | 0.47  | 0.76  | 0.76 | 0.90  |       | -0.95 | 0.99 | -1.07 | 0.58  | 0.13  | 0.16 | 0.30  | -0.14 | 0.04  | 0.04 | 0.09  | -0.34 | -0.29 | 0.44 | -0.32 | -0.10 | -0.54 | 0.61 | -0.42 |
| FBgn0265193 | Atf-2  | Activating transcription factor-2   | -0.76 | -0.39 | 0.44 | -0.49 | 0.21  | -0.04 | 0.03 | -0.03 | -0.08 | 0.02  | 0.03 | -0.06 | 0.11  | 0.08  | 0.07 | 0.06  | 0.63  | 0.71  | 0.88 | 0.85  | -0.75 | -0.64 | 0.62 | -0.68 |
| FBgn0024326 | Mkk4   | MAP kinase kinase 4                 | 0.12  | 0.30  | 0.32 | 0.36  | -0.06 | -0.06 | 0.08 | -0.12 | -0.13 | 0.04  | 0.07 | 0.12  | 0.01  | -0.08 | 0.06 | -0.03 | -0.59 | -0.43 | 0.40 | -0.35 | -0.27 | -0.26 | 0.16 | -0.08 |
| FBgn0038167 | Lkb1   | Lkb1 kinase                         | -0.30 | -0.64 | 0.68 | -0.67 |       | 0.27  | 0.24 | 0.21  | 0.14  | 0.19  | 0.14 | 0.18  | 1.06  | 0.46  | 0.47 | 0.49  | 0.71  | 0.55  | 0.68 | 0.70  | 0.26  | 0.28  | 0.35 | 0.39  |
| FBgn0243512 | puc    | puckered                            | 0.34  | 0.29  | 0.27 | 0.29  | -0.50 | -0.26 | 0.26 | -0.30 | 0.51  | 0.47  | 0.43 | 0.46  | 0.07  | 0.09  | 0.11 | 0.12  | -0.17 | -0.10 | 0.02 | 0.04  | -0.16 | -0.09 | 0.03 | 0.02  |
| FBgn0039532 | Mtl    | Mig-2-like                          | 0.69  | 0.43  | 0.43 | 0.41  | 0.21  | 0.17  | 0.31 | 0.30  | 0.22  | 0.19  | 0.15 | 0.15  | 0.16  | -0.11 | 0.11 | -0.11 | 0.18  | 0.09  | 0.28 | 0.27  | -0.06 | -0.09 | 0.00 | -0.05 |
| FBgn0264324 | spg    | sponge                              | 0.55  | -0.20 | 0.18 | -0.04 | 0.98  | 0.43  | 0.40 | 0.31  | 1.22  | -0.22 | 0.08 | -0.05 | -0.41 | -0.04 | 0.05 | 0.01  | -0.66 | 0.34  | 0.19 | 0.32  | 0.72  | 0.11  | 0.03 | 0.24  |
| FBgn0010909 | msn    | misshapen                           | 0.97  | 0.54  | 0.59 | 0.69  | -0.18 | -0.16 | 0.22 | -0.28 | 0.09  | 0.14  | 0.00 | 0.30  | 0.04  | -0.04 | 0.02 | 0.02  | -0.07 | -0.13 | 0.25 | -0.16 | 0.08  | -0.09 | 0.11 | 0.04  |
| FBgn0031044 | MKP-4  | MAPK Phosphatase 4                  | 0.23  | -0.58 | 0.60 | -0.60 |       | -0.44 | 0.37 | -0.39 | 0.21  | 0.57  | 0.50 | 0.51  |       | 0.35  | 0.35 | 0.35  | -0.29 | -0.48 | 0.28 | -0.28 | 0.26  | 0.27  | 0.29 | 0.31  |
| FBgn0035437 | Strip  | Striatin interacting protein        | -0.56 | -0.36 | 0.35 | -0.29 | -0.38 | -0.08 | 0.14 | -0.19 | 0.08  | -0.12 | 0.00 | -0.03 | -0.21 | -0.18 | 0.16 | -0.13 | 0.21  | 0.52  | 0.55 | 0.61  | 0.09  | 0.17  | 0.24 | 0.33  |
| FBgn0032006 | Pvr    | PDGF- and VEGF-receptor related     | -0.30 | -0.04 | 0.01 | 0.11  | -0.01 | -0.49 | 0.52 | -0.59 | 0.02  | -0.39 | 0.32 | -0.22 | -0.32 | -0.07 | 0.06 | -0.01 | 0.19  | 0.69  | 0.57 | 0.66  | 0.19  | 0.27  | 0.22 | 0.38  |
| FBgn0050476 | ave    | aveugle                             | -0.21 | -0.33 | 0.32 | -0.47 | 0.14  | 0.11  | 0.01 | 0.06  | 0.25  | 0.32  | 0.37 | 0.25  | 0.42  | 0.23  | 0.24 | 0.19  | -0.38 | -0.10 | 0.38 | -0.50 | 0.06  | 0.16  | 0.07 | -0.12 |
| FBgn0261456 | hpo    | hippo                               | 1.30  | 0.30  | 0.28 | 0.30  | -0.48 | -0.02 | 0.01 | -0.04 | 1.28  | 0.20  | 0.15 | 0.18  | -0.40 | -0.19 | 0.18 | -0.17 | -0.45 | -0.21 | 0.09 | -0.06 | 0.28  | 0.15  | 0.23 | 0.28  |
| FBgn0266377 | Pde8   | Phosphodiesterase 8                 | 0.58  | 0.09  | 0.15 | 0.24  | -1.10 | -0.39 | 0.45 | -0.51 | -0.48 | -0.01 | 0.06 | 0.15  | -0.09 | 0.17  | 0.09 | 0.23  | 0.04  | 0.03  | 0.08 | 0.00  | -0.20 | 0.09  | 0.08 | 0.21  |
| FBgn0030976 | CG7378 |                                     | 0.42  | 0.20  | 0.20 | 0.21  | -0.36 | -0.24 | 0.26 | -0.28 | 0.06  | -0.02 | 0.05 | -0.03 | 0.16  | 0.16  | 0.17 | 0.19  | -0.09 | -0.02 | 0.00 | 0.11  | 0.15  | -0.14 | 0.05 | -0.01 |
| FBgn0032208 | Ufd4   | Ubiquitin fusion-degradation 4-like | -0.34 | -0.12 | 0.13 | 0.02  | 0.23  | 0.07  | 0.03 | -0.06 | -0.21 | -0.15 | 0.14 | 0.01  | -0.38 | -0.17 | 0.19 | -0.12 | 0.09  | 0.12  | 0.04 | 0.09  | -0.18 | -0.15 | 0.24 | -0.02 |
| FBgn0031885 | Mnn1   | Menin 1                             | 0.02  | -0.09 | 0.00 | 0.07  | -0.02 | -0.20 | 0.28 | -0.33 | 0.14  | 0.12  | 0.22 | 0.29  | -0.01 | -0.13 | 0.11 | -0.07 | -0.60 | -0.51 | 0.61 | -0.54 | 0.02  | -0.08 | 0.06 | 0.05  |
| FBgn0034110 | Atg9   | Autophagy-related 9                 | -0.47 | -0.28 | 0.27 | -0.25 | -0.55 | -0.71 | 0.76 | -0.79 | -0.08 | -0.06 | 0.03 | 0.02  | 0.20  | 0.39  | 0.22 | 0.44  | 0.35  | 0.11  | 0.17 | 0.21  | 0.74  | 0.66  | 0.73 | 0.80  |
| FBgn0033160 | Dhx15  | DEAH-box helicase 15                | -0.51 | -0.51 | 0.52 | -0.50 | 0.17  | 0.01  | 0.00 | -0.04 | 0.20  | 0.07  | 0.02 | 0.06  | 0.45  | 0.36  | 0.37 | 0.39  | 0.02  | 0.14  | 0.26 | 0.29  | -0.07 | 0.02  | 0.08 | 0.13  |
| FBgn0267339 | p38c   | p38c MAP kinase                     | 0.94  | 0.98  | 1.01 | 0.94  | 0.06  | -0.56 | 0.42 | -0.42 | -0.57 | -0.29 | 0.09 | -0.34 |       | -0.21 | 0.00 | -0.30 | -0.15 | -0.46 | 0.43 | -0.48 | 0.37  | 0.53  | 0.45 | 0.37  |

|             |          |                                                   |       |       |      |       |       |       |      |       |       |       |      |       |       |       |      |       |       |       |      |       |       |       |      |       |
|-------------|----------|---------------------------------------------------|-------|-------|------|-------|-------|-------|------|-------|-------|-------|------|-------|-------|-------|------|-------|-------|-------|------|-------|-------|-------|------|-------|
| FBgn0037655 | Kcmf1    | Potassium channel modulatory factor 1             | -0.55 | -0.44 | 0.49 | -0.47 | 0.03  | -0.04 | 0.06 | -0.08 | 0.05  | 0.10  | 0.06 | 0.09  | 0.21  | 0.20  | 0.21 | 0.23  | 0.08  | -0.08 | 0.02 | 0.05  | -0.22 | -0.22 | 0.15 | -0.11 |
| FBgn0030613 | Rab3-GEF | Rab3 GDP-GTP exchange factor                      | -0.33 | -0.29 | 0.32 | -0.17 | -0.43 | -0.29 | 0.31 | -0.41 | -0.28 | -0.16 | 0.14 | 0.00  | 0.06  | 0.13  | 0.14 | 0.20  | -0.08 | -0.11 | 0.26 | -0.13 | -0.29 | -0.09 | 0.18 | 0.04  |
| FBgn0010303 | hep      | hemipterous                                       | 0.28  | -0.05 | 0.01 | 0.10  | -0.40 | -0.55 | 0.61 | -0.68 | 0.50  | 0.22  | 0.29 | 0.38  | -0.49 | -0.23 | 0.22 | -0.18 | 0.42  | 0.31  | 0.20 | 0.29  | -0.26 | 0.15  | 0.13 | 0.27  |
| FBgn0034894 | sigmar   | salivary glands marred                            | 1.01  | 0.06  | 0.03 | 0.02  | -0.47 | -0.27 | 0.14 | -0.15 | 0.38  | 0.47  | 0.40 | 0.41  | 0.37  | 0.01  | 0.01 | 0.01  | -0.27 | -0.40 | 0.21 | -0.22 | -0.05 | -0.01 | 0.02 | 0.02  |
| FBgn0040206 | krz      | kurtz                                             | 1.78  | 0.38  | 0.50 | 0.55  | -0.93 | 0.03  | 0.04 | -0.09 | 0.45  | 0.06  | 0.14 | 0.21  | 0.44  | -0.04 | 0.00 | 0.00  | -0.01 | 0.10  | 0.02 | 0.07  | 0.19  | -0.26 | 0.24 | -0.14 |
| FBgn0035538 | DopEcR   | Dopamine/Ecdysteroid receptor                     | 0.16  | 0.25  | 0.24 | 0.30  | -0.04 | 0.11  | 0.00 | 0.05  | -0.05 | 0.08  | 0.00 | 0.16  | -0.27 | -0.13 | 0.11 | -0.09 | 0.12  | -0.01 | 0.02 | 0.07  | -0.22 | -0.22 | 0.04 | -0.05 |
| FBgn0264922 | smt3     | smt3                                              | 0.17  | 0.28  | 0.23 | 0.12  | -0.08 | -0.02 | 0.14 | -0.10 | 0.06  | 0.14  | 0.16 | 0.07  | 0.02  | 0.06  | 0.00 | 0.01  | -0.58 | -0.32 | 0.63 | -0.72 | 0.04  | 0.14  | 0.03 | -0.11 |
| FBgn0032840 | sNPF     | short neuropeptide F precursor                    | 0.29  | 0.20  | 0.18 | 0.19  | -0.62 | -0.12 | 0.15 | -0.18 | 0.98  | 0.29  | 0.26 | 0.28  | 0.27  | 0.01  | 0.02 | 0.03  | -0.13 | -0.06 | 0.06 | 0.09  | 0.67  | 0.03  | 0.11 | 0.15  |
| FBgn0040505 | Alk      | Anaplastic lymphoma kinase                        | -0.16 | 0.00  | 0.00 | 0.15  | 0.38  | -0.15 | 0.18 | -0.28 | -0.01 | 0.12  | 0.13 | 0.28  | 0.07  | 0.02  | 0.00 | 0.07  | -0.71 | -0.63 | 0.79 | -0.64 | -0.01 | -0.03 | 0.13 | 0.11  |
| FBgn0034199 | Gbp1     | Growth-blocking peptide 1                         | 0.01  | -0.17 | 0.14 | -0.31 | -0.20 | 0.06  | 0.12 | -0.05 | -0.02 | -0.07 | 0.00 | -0.14 | -0.02 | -0.06 | 0.05 | -0.11 | -0.41 | -0.24 | 0.51 | -0.65 | -0.12 | -0.04 | 0.09 | -0.30 |
| FBgn0026319 | Traf4    | TNF-receptor-associated factor 4                  |       | 0.30  | 0.30 | 0.30  |       | -0.53 | 0.56 | -0.59 | 0.84  | 0.48  | 0.45 | 0.48  |       | 0.86  | 0.87 | 0.88  | 0.84  | 0.02  | 0.09 | 0.12  | 0.43  | 0.67  | 0.73 | 0.77  |
| FBgn0011706 | rpr      | reaper                                            | -0.40 | 0.04  | 0.06 | -0.15 | 0.14  | 0.16  | 0.21 | 0.24  | 0.05  | 0.28  | 0.00 | 0.23  | 0.66  | 0.69  | 0.72 | 0.70  | -0.57 | -0.65 | 0.79 | -0.87 | 0.26  | 0.25  | 0.30 | 0.02  |
| FBgn0259212 | cno      | canoe                                             | 0.53  | 0.14  | 0.17 | 0.31  | -0.10 | 0.15  | 0.10 | 0.01  | 0.25  | 0.07  | 0.09 | 0.22  | -0.46 | -0.10 | 0.11 | -0.05 | 0.00  | -0.08 | 0.23 | -0.10 | 0.33  | 0.02  | 0.00 | 0.16  |
| FBgn0024329 | Mekk1    | Mekk1                                             | -0.64 | -0.41 | 0.39 | -0.28 | 0.34  | 0.04  | 0.11 | -0.08 | -0.02 | -0.21 | 0.17 | -0.06 | 0.00  | -0.16 | 0.14 | -0.10 | 0.27  | 0.70  | 0.88 | 0.67  | 0.08  | 0.21  | 0.77 | 0.32  |
| FBgn0000370 | crc      | cryptocephal                                      |       | 0.48  | 0.49 | 0.49  |       | -0.18 | 0.14 | -0.16 |       | -0.19 | 0.22 | -0.20 |       | -0.30 | 0.28 | -0.27 |       | -0.45 | 0.31 | -0.30 |       | -0.23 | 0.12 | -0.10 |
| FBgn0261524 | lic      | licorne                                           | 0.05  | 0.16  | 0.13 | 0.13  | 0.36  | 0.34  | 0.41 | 0.39  | 0.01  | -0.09 | 0.14 | -0.13 | 0.08  | -0.05 | 0.06 | -0.05 | 0.30  | 0.40  | 0.58 | 0.58  | -0.21 | -0.06 | 0.03 | -0.03 |
| FBgn0000229 | bsk      | basket                                            | -0.08 | 0.04  | 0.01 | -0.04 | 0.17  | 0.02  | 0.00 | 0.09  | 0.05  | 0.11  | 0.04 | 0.03  | -0.30 | -0.20 | 0.22 | -0.23 | -0.40 | -0.62 | 0.44 | -0.45 | 0.04  | -0.05 | 0.06 | -0.08 |
| FBgn0004569 | aos      | argos                                             | 0.65  | 0.17  | 0.21 | 0.24  | -0.33 | 0.12  | 0.08 | 0.05  | -0.21 | -0.12 | 0.00 | -0.05 | 0.41  | 0.34  | 0.34 | 0.36  | -0.32 | -0.03 | 0.01 | 0.05  | 0.13  | 0.09  | 0.19 | 0.25  |
| FBgn0286070 | cnk      | connector enhancer of ksr                         | -0.48 | -0.39 | 0.35 | -0.24 | 1.18  | 0.27  | 0.22 | 0.15  | 0.03  | -0.14 | 0.09 | 0.02  | 0.18  | 0.19  | 0.21 | 0.25  | -0.75 | 0.22  | 0.09 | 0.19  | 0.17  | 0.09  | 0.04 | 0.20  |
| FBgn0011573 | Cdc37    | Cdc37                                             | -0.05 | 0.18  | 0.11 | 0.08  | 0.36  | 0.35  | 0.33 | 0.33  | -0.31 | -0.15 | 0.11 | -0.22 | 0.10  | 0.11  | 0.09 | 0.09  | 1.11  | 0.93  | 0.00 | 1.08  | 0.02  | 0.02  | 0.01 | -0.01 |
| FBgn0010333 | Rac1     | Rac1                                              | 0.49  | 0.17  | 0.15 | 0.13  | -0.38 | -0.15 | 0.09 | -0.10 | -0.19 | -0.03 | 0.08 | -0.09 | -0.19 | 0.07  | 0.07 | 0.07  | -0.20 | 0.14  | 0.22 | 0.31  | 0.34  | -0.02 | 0.02 | 0.01  |
| FBgn0016641 | PTP-ER   | Protein tyrosine phosphatase-ERK/Enhancer of Ras1 | -0.23 | -0.32 | 0.27 | -0.17 | -0.16 | -0.32 | 0.36 | -0.43 | -0.01 | -0.13 | 0.07 | 0.03  | -0.13 | -0.05 | 0.04 | 0.00  | -0.45 | -0.17 | 0.28 | -0.19 | 0.00  | 0.14  | 0.11 | 0.26  |
| FBgn0031030 | Tao      | Tao                                               | -0.48 | 0.00  | 0.00 | 0.04  | 0.63  | 0.42  | 0.09 | 0.35  | 0.03  | 0.16  | 0.09 | 0.24  | -0.14 | -0.02 | 0.02 | 0.01  | -0.24 | -0.16 | 0.13 | -0.08 | -0.05 | -0.03 | 0.05 | 0.14  |
| FBgn0034577 | cpa      | capping protein alpha                             | 0.54  | -0.03 | 0.06 | -0.07 | 0.08  | 0.27  | 0.03 | 0.32  | -0.08 | 0.06  | 0.00 | 0.00  | -0.23 | 0.06  | 0.05 | 0.06  | 0.18  | 0.45  | 0.22 | 0.62  | 0.04  | -0.11 | 0.07 | -0.07 |
| FBgn0010341 | Cdc42    | Cdc42                                             | -0.16 | -0.05 | 0.07 | -0.08 | 0.45  | 0.19  | 0.01 | 0.30  | -0.20 | -0.12 | 0.06 | -0.16 | -0.17 | -0.06 | 0.06 | -0.06 | -0.03 | -0.16 | 0.01 | 0.01  | 0.03  | -0.12 | 0.08 | -0.08 |

|             |          |                                                                   |       |       |      |       |       |       |      |       |       |      |       |       |       |      |       |       |       |      |       |       |       |      |       |
|-------------|----------|-------------------------------------------------------------------|-------|-------|------|-------|-------|-------|------|-------|-------|------|-------|-------|-------|------|-------|-------|-------|------|-------|-------|-------|------|-------|
| FBgn0040078 | pont     | pontin                                                            | 0.01  | 0.10  | 0.04 | 0.01  | 0.68  | 0.84  | 0.85 | 0.22  | -0.04 | 0.08 | -0.09 | 0.13  | -0.02 | 0.05 | -0.05 | 0.34  | 0.22  | 0.37 | 0.36  | -0.16 | -0.24 | 0.25 | -0.27 |
| FBgn0030964 | Pvf1     | PDGF- and VEGF-related factor 1                                   | -0.37 | -0.21 | 0.21 | -0.21 | -0.10 | -0.42 | 0.40 | 0.14  | 0.25  | 0.25 | 0.26  | -0.10 | -0.19 | 0.18 | -0.18 | 0.58  | 0.20  | 0.33 | 0.33  | 0.37  | 0.18  | 0.26 | 0.28  |
| FBgn0030674 | HUWE1    | HECT, UBA and WWE domain containing E3 ubiquitin protein ligase 1 | 0.11  | -0.18 | 0.26 | -0.04 | 0.33  | 0.12  | 0.13 | 0.20  | -0.06 | 0.11 | 0.10  | 0.03  | 0.20  | 0.16 | 0.25  | 0.11  | 0.14  | 0.07 | 0.13  | -0.26 | 0.00  | 0.19 | 0.13  |
| FBgn0024187 | syd      | sunday driver                                                     | 1.76  | 0.34  | 0.37 | 0.46  | -0.10 | 0.13  | 0.08 | 0.52  | 0.01  | 0.08 | 0.17  | -0.23 | 0.00  | 0.02 | 0.06  | -0.09 | 0.10  | 0.01 | 0.08  | 0.26  | 0.49  | 0.47 | 0.61  |
| FBgn0028546 | ics      | icarus                                                            | -0.27 | -0.06 | 0.09 | -0.14 | 0.17  | 0.11  | 0.18 | 0.08  | 0.09  | 0.03 | 0.01  | 0.18  | 0.04  | 0.03 | 0.02  | -0.11 | -0.32 | 0.02 | -0.16 | -0.22 | -0.31 | 0.00 | -0.34 |
| FBgn0032409 | Ced-12   | Ced-12                                                            | -0.08 | -0.05 | 0.08 | -0.05 | -0.05 | 0.22  | 0.22 | -0.16 | -0.06 | 0.00 | -0.07 | -0.02 | -0.17 | 0.06 | -0.15 | -0.31 | -0.37 | 0.05 | -0.22 | -0.18 | -0.18 | 0.00 | -0.05 |
| FBgn0004636 | Rap1     | Rap1 GTPase                                                       | 0.10  | -0.13 | 0.07 | -0.04 | -0.03 | 0.11  | 0.08 | -0.08 | -0.16 | 0.01 | -0.07 | -0.03 | -0.22 | 0.01 | -0.19 | -0.33 | -0.38 | 0.03 | -0.30 | -0.03 | -0.09 | 0.02 | 0.08  |
| FBgn0014011 | Rac2     | Rac2                                                              | -0.34 | -0.05 | 0.07 | -0.08 | 0.20  | -0.30 | 0.05 | 0.05  | 0.01  | 0.05 | -0.05 | 0.22  | 0.07  | 0.07 | 0.07  | -0.47 | -0.68 | 0.04 | -0.50 | -0.07 | -0.07 | 0.03 | -0.03 |
| FBgn0003502 | Btk29A   | Btk family kinase at 29A                                          | -0.52 | 0.10  | 0.18 | 0.25  | 0.18  | 0.16  | 0.09 | 0.12  | 0.17  | 0.04 | 0.31  | -0.30 | -0.17 | 0.06 | -0.13 | -0.07 | -0.12 | 0.02 | -0.15 | -0.28 | 0.01  | 0.03 | 0.13  |
| FBgn0011570 | cpb      | capping protein beta                                              | -0.11 | 0.06  | 0.00 | -0.02 | -0.38 | 0.15  | 0.07 | -0.32 | -0.15 | 0.01 | -0.22 | 0.14  | 0.02  | 0.00 | 0.00  | 0.34  | 0.23  | 0.04 | 0.38  | -0.09 | -0.10 | 0.02 | -0.14 |
| FBgn0003205 | Ras85D   | Ras oncogene at 85D                                               | 1.51  | 0.25  | 0.23 | 0.22  | -0.41 | 0.03  | 0.07 | 0.59  | 0.12  | 0.05 | 0.06  | 0.25  | 0.06  | 0.05 | 0.05  | 0.15  | -0.19 | 0.00 | 0.00  | 0.40  | -0.09 | 0.06 | -0.06 |
| FBgn0010407 | Ror      | Ror                                                               | -0.32 | -0.02 | 0.07 | -0.06 | 0.35  | -0.03 | 0.01 | -0.07 | 0.30  | 0.07 | 0.29  | 0.11  | 0.11  | 0.03 | 0.14  | -0.07 | -0.22 | 0.01 | -0.09 | -0.46 | -0.37 | 0.07 | -0.24 |
| FBgn0025743 | mbt      | mushroom bodies tiny                                              | -0.46 | -0.09 | 0.06 | -0.01 | 0.48  | 0.12  | 0.08 | -0.14 | 0.02  | 0.05 | 0.11  | 0.10  | 0.41  | 0.02 | 0.45  | -0.07 | -0.01 | 0.02 | 0.07  | 0.43  | 0.43  | 0.02 | 0.60  |
| FBgn0086361 | alph     | alphabet                                                          | -0.50 | -0.13 | 0.04 | -0.13 | 0.25  | 0.26  | 0.08 | -0.04 | 0.08  | 0.05 | 0.07  | -0.31 | 0.05  | 0.06 | 0.07  | -0.15 | -0.17 | 0.05 | -0.03 | -0.12 | -0.04 | 0.05 | 0.08  |
| FBgn0003139 | PpV      | Protein phosphatase V                                             | -0.07 | 0.02  | 0.02 | -0.05 | 0.56  | 0.36  | 0.03 | 0.11  | 0.12  | 0.06 | 0.05  | 0.20  | -0.04 | 0.07 | -0.07 | 0.09  | -0.06 | 0.03 | 0.11  | -0.14 | -0.10 | 0.01 | -0.13 |
| FBgn0261477 | slim     | scruin like at the midline                                        | 0.28  | -0.09 | 0.05 | -0.02 | -0.38 | -0.09 | 0.04 | 0.17  | -0.12 | 0.09 | -0.04 | 0.20  | 0.07  | 0.09 | 0.11  | 0.08  | 0.07  | 0.01 | 0.15  | 0.06  | -0.16 | 0.05 | 0.00  |
| FBgn0013987 | MAPK-Ak2 | MAP kinase activated protein-kinase-2                             | -0.12 | -0.04 | 0.07 | -0.07 | 0.21  | 0.16  | 0.02 | 0.05  | 0.11  | 0.03 | 0.04  | -0.14 | -0.02 | 0.02 | -0.02 | 0.22  | 0.29  | 0.06 | 0.46  | 0.20  | 0.01  | 0.03 | 0.04  |
| FBgn0026323 | Tak1     | TGF-beta activated kinase 1                                       | -0.54 | -0.21 | 0.03 | -0.22 | -0.20 | -0.13 | 0.07 | 0.01  | -0.05 | 0.07 | -0.04 | -0.26 | -0.04 | 0.03 | -0.02 | 0.36  | 0.15  | 0.06 | 0.29  | -0.32 | -0.02 | 0.05 | 0.09  |
| FBgn0037621 | M18P     | Motif 1 Binding Protein                                           | -0.07 | -0.01 | 0.09 | -0.13 | 0.28  | 0.65  | 0.08 | 0.02  | 0.17  | 0.01 | 0.09  | -0.01 | -0.02 | 0.04 | -0.05 | 0.23  | 0.37  | 0.04 | 0.52  | -0.09 | -0.02 | 0.02 | -0.05 |
| FBgn0028717 | Lnk      | Lnk                                                               | -0.36 | -0.20 | 0.03 | -0.18 | -0.02 | 0.02  | 0.01 | 0.13  | 0.27  | 0.00 | 0.35  | 0.26  | 0.27  | 0.00 | 0.32  | 0.00  | -0.09 | 0.05 | -0.01 | -0.02 | 0.33  | 0.01 | 0.48  |
| FBgn0025637 | SkpA     | SKP1-related A                                                    | 0.01  | 0.09  | 0.07 | -0.01 | 0.08  | -0.05 | 0.06 | -0.01 | 0.12  | 0.00 | 0.05  | 0.14  | 0.01  | 0.01 | -0.03 | -0.49 | -0.50 | 0.04 | -0.54 | -0.09 | -0.06 | 0.01 | -0.20 |
| FBgn0038972 | CG7054   |                                                                   | 0.11  | 0.03  | 0.03 | -0.12 | 0.15  | 0.05  | 0.07 | -0.03 | 0.02  | 0.05 | -0.02 | -0.02 | -0.07 | 0.07 | -0.10 | -0.32 | -0.24 | 0.04 | -0.48 | -0.12 | -0.05 | 0.04 | -0.25 |
| FBgn0037327 | PEK      | pancreatic eIF-2alpha kinase                                      | 0.21  | -0.20 | 0.03 | -0.05 | 0.24  | 0.04  | 0.00 | -0.01 | -0.23 | 0.05 | -0.07 | -0.15 | 0.15  | 0.06 | 0.20  | 0.02  | 0.29  | 0.08 | 0.25  | -0.10 | 0.07  | 0.06 | 0.19  |
| FBgn0264959 | Src42A   | Src oncogene at 42A                                               | 1.42  | -0.13 | 0.07 | 0.02  | 0.18  | 0.29  | 0.04 | 0.73  | -0.02 | 0.05 | 0.14  | -0.12 | -0.03 | 0.03 | 0.01  | -0.06 | 0.02  | 0.09 | -0.01 | -0.22 | -0.09 | 0.01 | 0.03  |
| FBgn0015295 | Shark    | SH2 ankyrin repeat kinase                                         | 0.10  | -0.17 | 0.04 | -0.11 | 0.48  | 0.27  | 0.00 | -0.42 | -0.22 | 0.04 | -0.18 | 0.10  | 0.43  | 0.09 | 0.50  | 0.07  | 0.25  | 0.09 | 0.34  | 0.25  | 0.40  | 0.07 | 0.55  |



[illegible]
